# Supplementary material for: Revisiting the Proposition of Binding Pockets and Bioactive Poses for GSK-3β Allosteric Modulators Addressed to Neurodegenerative Diseases
Source: MDPI journal article supplement (doi:10.3390/ijms22158252), 2021-07-31
Supplement: s1 [file s1]

# Revisiting the Proposition of Binding Pockets and Bioactive Poses for GSK-3 $\beta$ Allosteric Modulators Addressed to Neurodegenerative Diseases

Guilherme M. Silva <sup>1,\*</sup>, Rosivaldo S. Borges <sup>2,3,\*</sup>, Kelton L. B. Santos <sup>2,3</sup>, Leonardo B. Federico <sup>4</sup>, Isaque A. G. Francischini <sup>4</sup>, Suzane Q. Gomes <sup>1</sup>, Mariana P. Barcelos <sup>4</sup>, Rai C. Silva <sup>1</sup>, Cleydson B. R. Santos <sup>2,3,4</sup>  
and Carlos H. T. P. Silva <sup>1,2,4</sup>

<sup>1</sup> Departamento de Química, Faculdade de Filosofia, Ciências e Letras de Ribeirão Preto, Universidade de São Paulo, Ribeirão Preto 14040-901, SP, Brazil; suzane.quintana@usp.br (S.Q.G.); raics@usp.br (R.C.S.); tomich@fcrp.usp.br (C.H.T.P.S.)

<sup>2</sup> Programa de Pós-Graduação em Química Medicinal e Modelagem Molecular, Instituto de Ciências da Saúde, Universidade Federal do Pará, Belém 66075-110, PA, Brazil; keltonbelem@hotmail.com (K.L.B.S.); breno@unifap.br (C.B.R.S.)

<sup>3</sup> Laboratório de Modelagem em Química Computacional, Departamento de Ciências Biológicas e da Saúde, Universidade Federal do Amapá, Macapá 68902-280, AP, Brazil

<sup>4</sup> Laboratório Computacional de Química Farmacêutica, Faculdade de Ciências Farmacêuticas de Ribeirão Preto, Universidade de São Paulo, Av. do Café, s/n, Ribeirão Preto 14040-903, SP, Brazil; leonardobrunofederico@gmail.com (L.B.F.); isaque.francischini@usp.br (I.A.G.F.); mpbarcelos@usp.br (M.P.B.)

\* Correspondence: silvadm@usp.br (G.M.S.); lqfmed@gmail.com (R.S.B.)

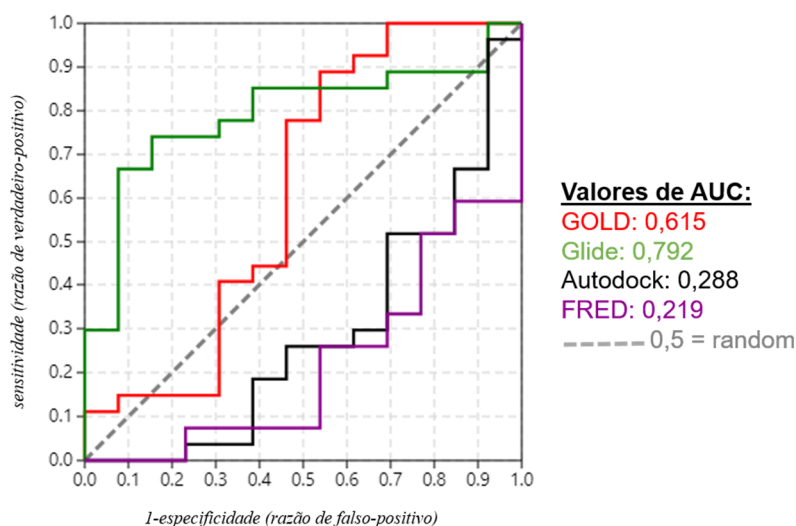

**Figure S1.** ROC curves obtained using only dataset of 40 compounds (**1** analogues) in order to perform docking validation.

**Table S1.** Dataset of 88 GSK-3 $\beta$  allosteric inhibitors compiled from literature<sup>(a, b, c, d)</sup> and used in this work to perform docking and vROCS-query validations, and corresponding IC<sub>50</sub> ( $\mu$ M) values.

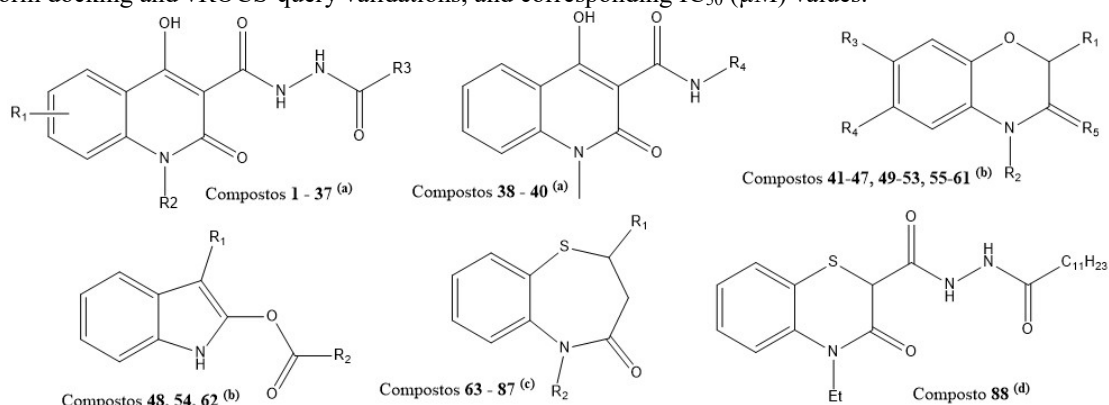

|    | R <sub>1</sub> | R <sub>2</sub>               | R <sub>3</sub>                              | R <sub>4</sub>                            | R <sub>5</sub> | IC <sub>50</sub> ( $\mu$ M) |    | R <sub>1</sub>    | R <sub>2</sub>           | R <sub>3</sub>     | R <sub>4</sub> | R <sub>5</sub> | IC <sub>50</sub> ( $\mu$ M) |
|----|----------------|------------------------------|---------------------------------------------|-------------------------------------------|----------------|-----------------------------|----|-------------------|--------------------------|--------------------|----------------|----------------|-----------------------------|
| 1  | H              | Et                           | C <sub>11</sub> H <sub>23</sub>             | -                                         | -              | 2,80                        | 45 | 1-naftil          | 4-OMe-bn                 | H                  | H              | O              | 8,10                        |
| 2  | H              | H                            | C <sub>11</sub> H <sub>23</sub>             | -                                         | -              | 4,50                        | 46 | 1-naftil          | 4-F-bn                   | OCH <sub>2</sub> O | H              | O              | 8,10                        |
| 3  | H              | Me                           | C <sub>11</sub> H <sub>23</sub>             | -                                         | -              | 7,30                        | 47 | 2-naftil          | 4-F-bn                   | H                  | H              | O              | 8,70                        |
| 4  | H              | Me                           | C <sub>7</sub> H <sub>15</sub>              | -                                         | -              | 8,70                        | 48 | 1-naftil          | Me                       | -                  | -              | -              | 10,00                       |
| 5  | H              | isoprenyl                    | C <sub>11</sub> H <sub>23</sub>             | -                                         | -              | 7,78                        | 49 | 1-naftil          | 4-F-bn                   | 1-morpholin        | H              | O              | 10,10                       |
| 6  | H              | isoprenyl                    | C <sub>7</sub> H <sub>15</sub>              | -                                         | -              | 7,11                        | 50 | 1-naftil          | 4-F-bn                   | F                  | H              | O              | 21,20                       |
| 7  | H              | CH <sub>2</sub> -cyclopropyl | C <sub>11</sub> H <sub>23</sub>             | -                                         | -              | 5,25                        | 51 | 1-naftil          | Et                       | OCH <sub>2</sub> O | H              | O              | 25,60                       |
| 8  | H              | Bn                           | C <sub>11</sub> H <sub>23</sub>             | -                                         | -              | 5,51                        | 52 | 1-naftil          | 4-CH <sub>3</sub> -bn    | H                  | H              | O              | 50,00                       |
| 9  | 6-F            | H                            | C <sub>11</sub> H <sub>23</sub>             | -                                         | -              | 5,80                        | 53 | phenyl            | Bn                       | OCH <sub>2</sub> O | H              | O              | 50,00                       |
| 10 | 6-Cl           | H                            | C <sub>11</sub> H <sub>23</sub>             | -                                         | -              | 3,81                        | 54 | 4-ch3-bn          | Me                       | -                  | -              | -              | 50,00                       |
| 11 | 6-Cl           | Me                           | C <sub>11</sub> H <sub>23</sub>             | -                                         | -              | 5,95                        | 55 | 1-naftil          | benzil                   | H                  | H              | O              | >50                         |
| 12 | 6-Cl           | Me                           | C <sub>7</sub> H <sub>15</sub>              | -                                         | -              | 8,48                        | 56 | 1-naftil          | 4-Cl-bn                  | H                  | H              | O              | >50                         |
| 13 | 6-Cl           | Et                           | C <sub>11</sub> H <sub>23</sub>             | -                                         | -              | 3,18                        | 57 | 1-naftil          | 4-NO <sub>2</sub> -bn    | H                  | H              | O              | >50                         |
| 14 | 6-Cl           | Et                           | C <sub>7</sub> H <sub>15</sub>              | -                                         | -              | 9,42                        | 58 | 1-naftil          | benzoyl                  | H                  | H              | HH             | >50                         |
| 15 | 6-Br           | H                            | C <sub>11</sub> H <sub>23</sub>             | -                                         | -              | 3,54                        | 59 | 1-naftil          | Me                       | OCH <sub>2</sub> O | H              | O              | >50                         |
| 16 | 6-Br           | Me                           | C <sub>11</sub> H <sub>23</sub>             | -                                         | -              | 4,28                        | 60 | phenyl            | Me                       | OCH <sub>2</sub> O | H              | O              | >50                         |
| 17 | 6-Br           | Me                           | C <sub>7</sub> H <sub>15</sub>              | -                                         | -              | 6,28                        | 61 | phenyl            | Et                       | OCH <sub>2</sub> O | H              | O              | >50                         |
| 18 | 6-Br           | Et                           | C <sub>11</sub> H <sub>23</sub>             | -                                         | -              | 2,01                        | 62 | 1-naftil          | NEt <sub>2</sub>         | -                  | -              | -              | >50                         |
| 19 | 6-Br           | Et                           | C <sub>7</sub> H <sub>15</sub>              | -                                         | -              | 7,34                        | 63 | 2-Thienyl         | Bn                       | -                  | -              | -              | 47,50                       |
| 20 | 7-Cl           | H                            | C <sub>11</sub> H <sub>23</sub>             | -                                         | -              | 3,12                        | 64 | 2-Furyl           | Bn                       | -                  | -              | -              | 77,20                       |
| 21 | 7-Cl           | H                            | C <sub>7</sub> H <sub>15</sub>              | -                                         | -              | 9,00                        | 65 | Ph                | Bn                       | -                  | -              | -              | 42,70                       |
| 22 | 7-Cl           | Me                           | C <sub>11</sub> H <sub>23</sub>             | -                                         | -              | 4,03                        | 66 | Ph                | 2-NO <sub>2</sub> -Bn    | -                  | -              | -              | 25,00                       |
| 23 | 7-Cl           | Me                           | C <sub>7</sub> H <sub>15</sub>              | -                                         | -              | 6,66                        | 67 | Ph                | 2-Br-Bn                  | -                  | -              | -              | 73,90                       |
| 24 | 7-Cl           | Et                           | C <sub>11</sub> H <sub>23</sub>             | -                                         | -              | 2,48                        | 68 | Ph                | 2-CH <sub>3</sub> -Bn    | -                  | -              | -              | 76,10                       |
| 25 | 7-Cl           | Et                           | C <sub>7</sub> H <sub>15</sub>              | -                                         | -              | 4,83                        | 69 | Ph                | 4-CH <sub>3</sub> O-Bn   | -                  | -              | -              | 73,70                       |
| 26 | 7-Cl           | Bn                           | C <sub>11</sub> H <sub>23</sub>             | -                                         | -              | 5,99                        | 70 | Ph                | 3-COOMe-Bn               | -                  | -              | -              | 27,80                       |
| 27 | 7-Cl           | Bn                           | C <sub>7</sub> H <sub>15</sub>              | -                                         | -              | 5,96                        | 71 | Ph                | 3-Cl-PhCOCH <sub>2</sub> | -                  | -              | -              | 37,80                       |
| 28 | H              | H                            | C <sub>7</sub> H <sub>15</sub>              | -                                         | -              | >20                         | 72 | PhCH <sub>2</sub> | 2-NO <sub>2</sub> -Bn    | -                  | -              | -              | 23,00                       |
| 29 | H              | Me                           | Ph                                          | -                                         | -              | >20                         | 73 | 4-F-Ph            | 2-NO <sub>2</sub> -Bn    | -                  | -              | -              | 81,50                       |
| 30 | H              | Me                           | Me                                          | -                                         | -              | >20                         | 74 | 4-Cl-Ph           | 2-NO <sub>2</sub> -Bn    | -                  | -              | -              | 71,30                       |
| 31 | H              | Me                           | Bn                                          | -                                         | -              | >20                         | 75 | 4-Br-Ph           | 2-NO <sub>2</sub> -Bn    | -                  | -              | -              | 67,80                       |
| 32 | H              | Me                           | (CH <sub>3</sub> ) <sub>2</sub> -indol-3-yl | -                                         | -              | >20                         | 76 | 2-Thienyl         | Et                       | -                  | -              | -              | >100                        |
| 33 | H              | Et                           | C <sub>7</sub> H <sub>15</sub>              | -                                         | -              | >20                         | 77 | 2-Thienyl         | i-Pr                     | -                  | -              | -              | >100                        |
| 34 | H              | Et                           | (CH <sub>3</sub> ) <sub>2</sub> -indol-3-yl | -                                         | -              | >20                         | 78 | 2-Thienyl         | n-Bu                     | -                  | -              | -              | >100                        |
| 35 | H              | Et                           | (CH <sub>3</sub> ) <sub>2</sub> -(4-OH-Ph)  | -                                         | -              | >20                         | 79 | 2-Thienyl         | Cyclohexylmethyl         | -                  | -              | -              | >100                        |
| 36 | H              | isobutyl                     | C <sub>11</sub> H <sub>23</sub>             | -                                         | -              | >20                         | 80 | 2-Thienyl         | Benzoyl                  | -                  | -              | -              | >100                        |
| 37 | 6-F            | H                            | C <sub>7</sub> H <sub>15</sub>              | -                                         | -              | >20                         | 81 | H                 | Bn                       | -                  | -              | -              | >100                        |
| 38 | -              | -                            | -                                           | C <sub>6</sub> H <sub>13</sub>            | -              | >20                         | 82 | Me                | Bn                       | -                  | -              | -              | >100                        |
| 39 | -              | -                            | -                                           | CH <sub>3</sub> CONHCH <sub>2</sub> COOBn | -              | >20                         | 83 | 3-Pyridyl         | Bn                       | -                  | -              | -              | >100                        |
| 40 | -              | -                            | -                                           | NH-(CH <sub>2</sub> ) <sub>2</sub> -CN    | -              | >20                         | 84 | Ph                | 2-CN-Bn                  | -                  | -              | -              | >100                        |
| 41 | 1-naftil       | SO <sub>2</sub> -phenyl      | H                                           | H                                         | HH             | 4,10                        | 85 | Ph                | 2-F-Bn                   | -                  | -              | -              | >100                        |
| 42 | 1-naftil       | 4-F-bn                       | H                                           | H                                         | O              | 5,40                        | 86 | Ph                | 2-Cl-Bn                  | -                  | -              | -              | >100                        |
| 43 | 1-naftil       | bn                           | OCH <sub>2</sub> O                          | H                                         | O              | 6,40                        | 87 | Ph                | 3-COOH-Bn                | -                  | -              | -              | >100                        |
| 44 | 2-naftil       | bn                           | OCH <sub>2</sub> O                          | H                                         | O              | 6,90                        | 88 | -                 | -                        | -                  | -              | -              | 8,00                        |

\*In green compounds considered as actives, and in red compounds considered inactive, according to threshold of 20  $\mu$ M of IC<sub>50</sub> values. <sup>(a)</sup> PALOMO et al., 2017 [28]; <sup>(b)</sup> BROGI et al., 2017 [24]; <sup>(c)</sup> ZHANG et al., 2013 [25]; <sup>(d)</sup> ZHANG et al., 2014 [26].

**Table S2.** Number of compounds filtered in each step/filter performed in our virtual screening campaign.

| Main methodology | Reference/Query | VS filter                   | Chembridge CNS | Princeton | eMolecules |
|------------------|-----------------|-----------------------------|----------------|-----------|------------|
| ligand-based VS  | Compound 1      | -                           | 53.306         | 511.340   | 12.607.334 |
|                  |                 | <b>ROCS (shape)</b>         | 5.000          | 5.000     | 5.000      |
|                  |                 | EON (electrostatic)         | 1.000          | 1.000     | 1.000      |
|                  |                 | QikProp (ADME)              | 536            |           |            |
|                  |                 | DEREK (Tox)                 | 332            |           |            |
|                  |                 | Docking + Visual inspection | ~ 30           |           |            |

**Table S3.** Mean average values of released energy obtained for five compounds by each basis set.

| Compound            | Energy released (kcal/mol)         |                                    |
|---------------------|------------------------------------|------------------------------------|
|                     | Basis set 1 (Hartree) <sup>1</sup> | Basis set 2 (Hartree) <sup>2</sup> |
| 1                   | -1400.84                           | -1401.18                           |
| 18                  | -3971.93                           | -3974.68                           |
| 24                  | -1860.46                           | -1860.83                           |
| LCQFGS01            | -1367.73                           | -1367.99                           |
| LCQFGS02            | -860.69                            | -860.89                            |
| <b>Mean average</b> | <b>-1892.33</b>                    | <b>-1893.12</b>                    |

<sup>1</sup> B3LYP/6-311+G(d,p); <sup>2</sup> B3LYP/6-311++G(2d,2p)

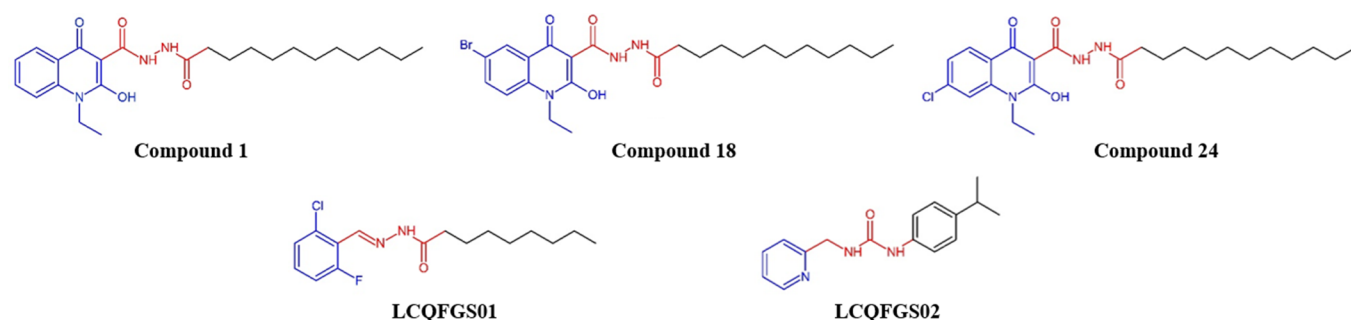

**Figure S2.** Representation of chemical structures of five selected compounds for quantum chemical studies. Blue and red portions respectively corresponds to moieties of quinolone and carbohydrazide for compounds **1**, **18**, **24**; halogenated benzene and methylenehydrazide for **LCQFGS01**; pyridine and carbamide for **LCQFGS02**.

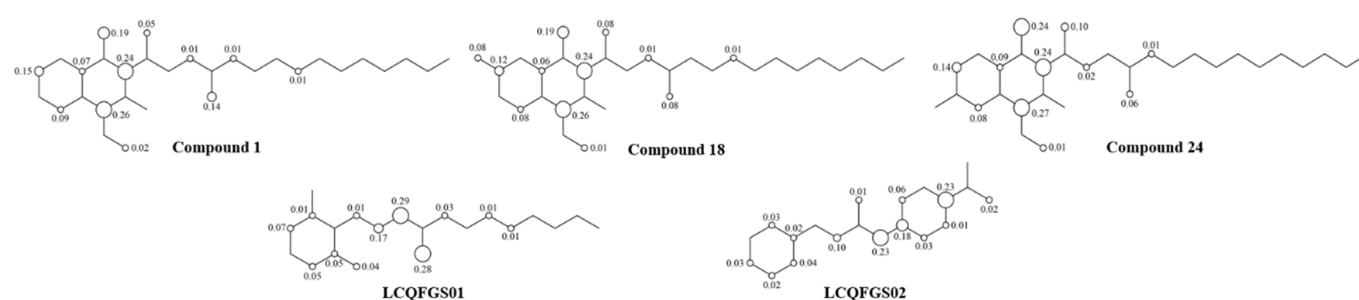

**Figure S3.** Spin density contributions of 5 compounds studied.

**Table S4.** AUC, TG and BEDROC values obtained in corresponding ROC curves plotted for docking and shape similarity (vROCS) validations, where queries refer to poses of compound **1** obtained by corresponding docking software, and applied to dataset of 88 compounds with and without decoys.

| Docking validation | 88 compounds |       |        | 88 compounds + decoys |       |        | 40 compounds* |       |        |
|--------------------|--------------|-------|--------|-----------------------|-------|--------|---------------|-------|--------|
|                    | AUC          | TG    | BEDROC | AUC                   | TG    | BEDROC | AUC           | TG    | BEDROC |
| <b>GOLD</b>        | 0.843        | 0.474 | 0.729  | 0.705                 | 0.310 | 0.223  | 0.615         | 0.169 | 0.848  |
| <b>Glide</b>       | 0.840        | 0.455 | 0.985  | 0.685                 | 0.240 | 0.177  | 0.792         | 0.381 | 0.993  |
| <b>Autodock</b>    | 0.328        | 0.272 | 0.148  | 0.376                 | 0.157 | 0.002  | 0.288         | 0.318 | 0.133  |
| <b>FRED</b>        | 0.350        | 0.207 | 0.309  | 0.695                 | 0.267 | 0.149  | 0.219         | 0.449 | 0.15   |

  

| vROCS validation      | 88 compounds |       |        | 88 compounds + decoys |       |        |
|-----------------------|--------------|-------|--------|-----------------------|-------|--------|
|                       | AUC          | TG    | BEDROC | AUC                   | TG    | BEDROC |
| <b>GOLD query</b>     | 0.760        | 0.496 | 0.947  | 0.745                 | 0.583 | 0.666  |
| <b>Glide query</b>    | 0.744        | 0.475 | 0.772  | 0.756                 | 0.578 | 0.648  |
| <b>Autodock query</b> | 0.695        | 0.400 | 0.287  | 0.749                 | 0.540 | 0.623  |
| <b>FRED query</b>     | 0.745        | 0.500 | 0.932  | 0.758                 | 0.580 | 0.668  |
| <b>OMEGA query</b>    | 0.684        | 0.496 | 0.943  | 0.684                 | 0.570 | 0.670  |

AUC: Area Under the Curve (calculated from respective ROC curves); TG: Total gains quantify the association between the variations of the scores and the detection of active compounds; BEDROC: Boltzmann Enhanced Discriminations of ROC quantify the early recognition of active compounds. All metrics retrieved from <http://stats.drugdesign.fr/>;

\* Smaller dataset of 40 compounds used in preliminary docking validation (section 2.4 and Figure S1).
